# Supplementary material for: Characteristics and ecological risks of microplastic pollution in a tropical drinking water source reservoir in Hainan province, China
Source: Royal Society of Chemistry journal article supplement (doi:10.1039/d3em00528c), 2024-01-01
Supplement: d3em00528c1.pdf [file d3em00528c1.pdf]

Supporting information prepared for publication in *Environmental Science Processes & Impacts*

Characteristics and ecological risks of microplastics pollution in a tropical  
drinking water source reservoir in Hainan province, China

*Ling Mo*<sup>a</sup>, *Hongyu Fu*<sup>b, d</sup>, *Qiyuan Lu*<sup>b</sup>, *Sifan Chen*<sup>b, e</sup>, *Ruijuan Liu*<sup>b</sup>, *Jun Xiang*<sup>b</sup>, *Xing Qiao*<sup>a</sup>,

*Licheng Wang*<sup>a</sup>, *Kexin Sun*<sup>c</sup>, *Bowen Li*<sup>b\*</sup>, *Jing Zheng*<sup>b\*</sup>

*\*Corresponding author. E-mail address:*

[libowen2023@outlook.com](mailto:libowen2023@outlook.com) (Bowen Li); [zhengjing@scies.org](mailto:zhengjing@scies.org) (Jing Zheng).

**This PDF file includes:**

The numbers of tables: 2

**Table S1. The potential ecological hazards of microplastic in water from each sampling sites.**

| Sampling sites           | $E_r^i$      |      |      |        |        |       | $RI$ |        |        |
|--------------------------|--------------|------|------|--------|--------|-------|------|--------|--------|
|                          | PS           | PP   | PVC  | PE     | PET    | nylon |      |        |        |
| <b>Reservoir</b>         | W1           | -    | -    | -      | -      | 0.13  | -    | 0.13   |        |
|                          | W2           | -    | -    | -      | -      | 0.53  | 1.67 | 2.21   |        |
|                          | W4           | -    | 0.07 | -      | -      | 0.27  | -    | 0.33   |        |
|                          | W9           | -    | 0.10 | -      | -      | 1.60  | -    | 1.70   |        |
|                          | W10          | -    | 0.03 | -      | -      | 1.20  | -    | 1.24   |        |
|                          | W11          | -    | 0.03 | -      | -      | 1.20  | -    | 1.24   |        |
|                          | W12          | -    | 0.17 | -      | -      | 0.94  | 3.34 | 4.44   |        |
|                          | W13          | -    | 0.13 | -      | -      | 0.94  | 1.67 | 2.74   |        |
|                          | W14          | -    | 0.13 | -      | -      | 0.67  | -    | 0.80   |        |
|                          | <b>Basin</b> | W3   | -    | 0.17   | -      | -     | 0.27 | -      | 0.43   |
|                          |              | W5   | -    | 0.10   | -      | 0.37  | 0.13 | -      | 0.60   |
|                          |              | W6   | -    | 0.13   | -      | -     | 1.87 | -      | 2.01   |
|                          |              | W7   | -    | -      | 334.20 | 0.37  | 0.53 | 1.67   | 336.78 |
|                          |              | W8   | -    | 0.13   | -      | -     | 0.53 | -      | 0.67   |
| <b>Living area</b>       | W21          | -    | 0.23 | -      | 0.37   | 0.80  | -    | 1.40   |        |
|                          | W22          | -    | 0.27 | -      | -      | 0.80  | -    | 1.07   |        |
|                          | W23          | -    | 0.07 | -      | -      | 0.27  | 1.67 | 2.01   |        |
|                          | W24          | -    | 0.07 | 334.20 | -      | 0.27  | 1.67 | 336.21 |        |
|                          | W25          | -    | 0.10 | -      | -      | 0.27  | -    | 0.37   |        |
|                          | W26          | -    | 0.07 | -      | -      | 0.40  | -    | 0.47   |        |
|                          | W27          | 1.00 | 0.23 | -      | -      | 0.53  | 1.67 | 3.44   |        |
|                          | W28          | -    | -    | -      | -      | 0.13  | 1.67 | 1.80   |        |
|                          | W29          | -    | 0.13 | -      | -      | 0.27  | -    | 0.40   |        |
| <b>Agricultural area</b> | W15          | -    | -    | -      | -      | 0.13  | -    | 0.13   |        |
|                          | W16          | -    | 0.10 | -      | -      | 0.80  | 1.67 | 2.57   |        |
|                          | W17          | -    | 0.07 | -      | -      | 0.40  | 0.00 | 0.47   |        |
|                          | W18          | -    | 0.07 | -      | -      | 0.40  | 1.67 | 2.14   |        |
|                          | W19          | -    | 0.13 | -      | -      | 0.53  | -    | 0.67   |        |
|                          | W20          | -    | 0.10 | -      | -      | 0.67  | -    | 0.77   |        |

\* The symbol “-” means “not detected” in the sampling sites.  $E_r^i$ : Ecological Risk Index;  $RI$ : potential ecological hazard index;

**Table S2. The potential ecological hazards of microplastic in sediments from each sampling sites.**

| Sampling sites     | $E_r^i$                  |      |      |        |        |       | $RI$ |        |        |
|--------------------|--------------------------|------|------|--------|--------|-------|------|--------|--------|
|                    | PS                       | PP   | PVC  | PE     | PET    | nylon |      |        |        |
| <b>Reservoir</b>   | W1                       | -    | 0.60 | -      | 0.51   | 0.56  | -    | 1.67   |        |
|                    | W2                       | -    | 0.23 | -      | -      | 0.37  | -    | 0.60   |        |
|                    | W4                       | 1.39 | 0.74 | -      | -      | 0.93  | -    | 3.06   |        |
|                    | W9                       | -    | 1.06 | -      | -      | 0.37  | -    | 1.44   |        |
|                    | W10                      | -    | 0.37 | -      | 0.51   | -     | -    | 0.88   |        |
|                    | W11                      | -    | 0.28 | -      | -      | 0.19  | 2.31 | 2.78   |        |
|                    | W12                      | -    | 0.42 | -      | -      | 0.56  | -    | 0.97   |        |
|                    | W13                      | -    | 0.23 | -      | -      | 0.74  | -    | 0.97   |        |
|                    | W14                      | -    | 0.23 | 463.01 | -      | 0.37  | 2.31 | 465.93 |        |
|                    | <b>Basin</b>             | W3   | -    | 0.05   | -      | -     | 0.56 | -      | 0.60   |
|                    |                          | W5   | -    | 0.23   | 463.01 | -     | 0.56 | -      | 463.80 |
|                    |                          | W6   | -    | -      | -      | 0.51  | 0.19 | 2.31   | 3.01   |
|                    |                          | W7   | -    | 0.05   | -      | -     | 0.37 | -      | 0.42   |
|                    |                          | W8   | -    | 0.05   | -      | 1.02  | 0.19 | 2.31   | 3.56   |
| <b>Living area</b> |                          | W21  | -    | -      | -      | -     | -    | 2.31   | 2.31   |
|                    | W22                      | -    | 0.14 | -      | -      | 0.56  | -    | 0.69   |        |
|                    | W23                      | -    | 0.37 | -      | -      | 0.37  | -    | 0.74   |        |
|                    | W24                      | 1.39 | 0.09 | 463.01 | -      | 0.37  | -    | 464.86 |        |
|                    | W25                      | -    | 0.05 | -      | -      | 1.30  | -    | 1.34   |        |
|                    | W26                      | -    | 0.04 | -      | -      | -     | -    | 0.04   |        |
|                    | <b>Agricultural area</b> | W15  | -    | 0.05   | -      | -     | 0.37 | -      | 0.42   |
| W16                |                          | -    | 0.69 | -      | -      | 1.11  | -    | 1.81   |        |
| W17                |                          | -    | 1.16 | -      | -      | 0.56  | -    | 1.71   |        |
| W18                |                          | -    | 0.05 | -      | -      | 0.19  | -    | 0.23   |        |
| W19                |                          | -    | 0.56 | -      | 1.02   | 0.37  | -    | 1.94   |        |
| W20                |                          | -    | 0.09 | -      | 0.51   | 1.85  | -    | 2.45   |        |

\* The symbol “-” means “not detected” in the sampling sites.  $E_r^i$ : Ecological Risk Index;  $RI$ : potential ecological hazard index;
